# Supplementary material for: Nectar sugars and amino acids in day- and night-flowering Nicotiana species are more strongly shaped by pollinators’ preferences than organic acids and inorganic ions
Source: PubMed Central journal article supplement (PMC5415175; doi:10.1371/journal.pone.0176865), 2017-05-03
Supplement: pone.0176865.s001.pdf [file pone.0176865.s001.pdf]

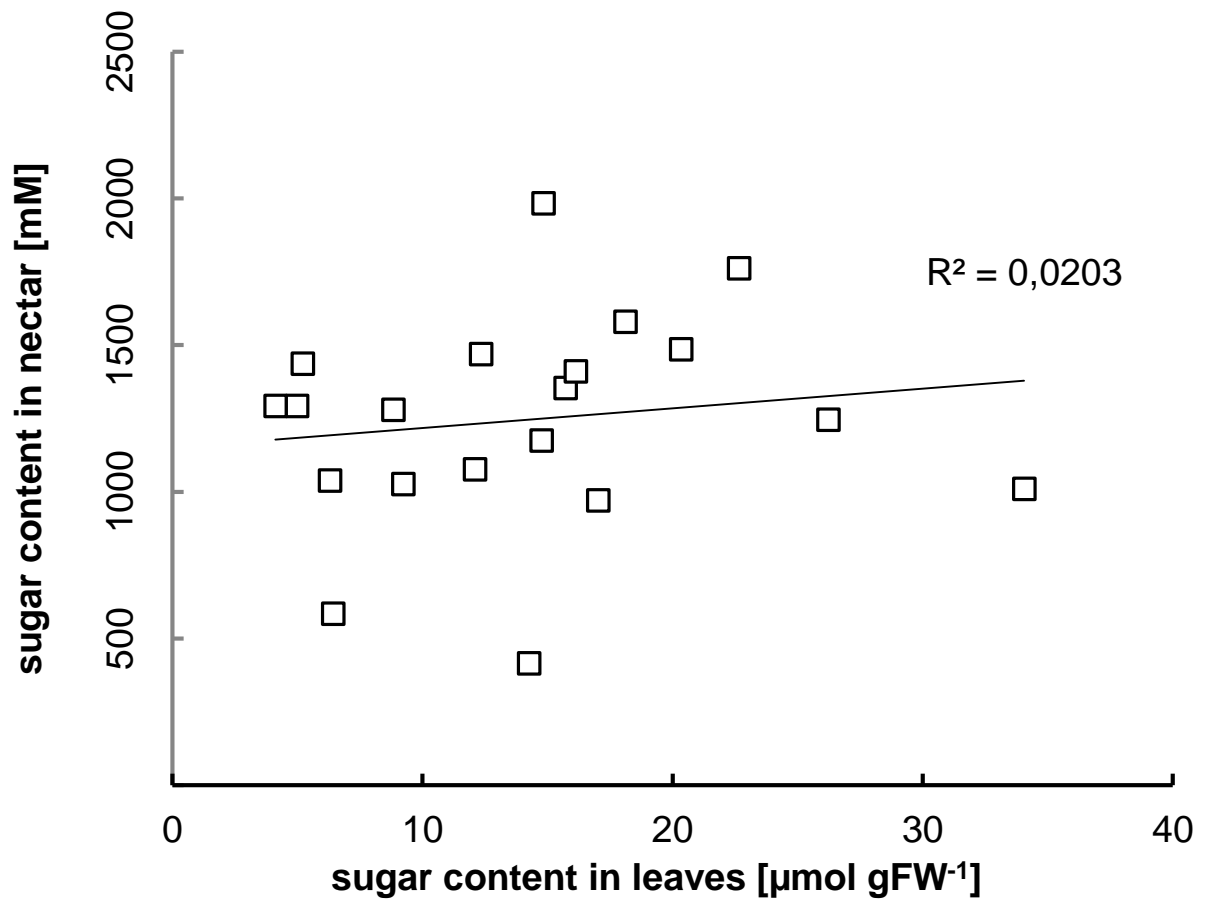

**S1 Fig.** Total sugar contents in leaves [ $\mu\text{mol gFW}^{-1}$ ] and in nectar [mM] of the same *Nicotiana* species. Neither does a noteworthy correlation exist between the total concentrations in nectar and leaves ( $R^2 = 0.02$ ,  $p = 0.108$ ) nor between the percentages of the main sugars in leaves and in nectar, e.g. glucose ( $R^2 = 0.005$ ,  $p = 0.020$ ), fructose ( $R^2 = 0.001$ ,  $p = 0.130$ ), and sucrose ( $R^2 = 0.073$ ,  $p < 0.001$ ).
