# Supplementary material for: Nectar sugars and amino acids in day- and night-flowering Nicotiana species are more strongly shaped by pollinators’ preferences than organic acids and inorganic ions
Source: PubMed Central journal article supplement (PMC5415175; doi:10.1371/journal.pone.0176865), 2017-05-03
Supplement: pone.0176865.s003.pdf [file pone.0176865.s003.pdf]

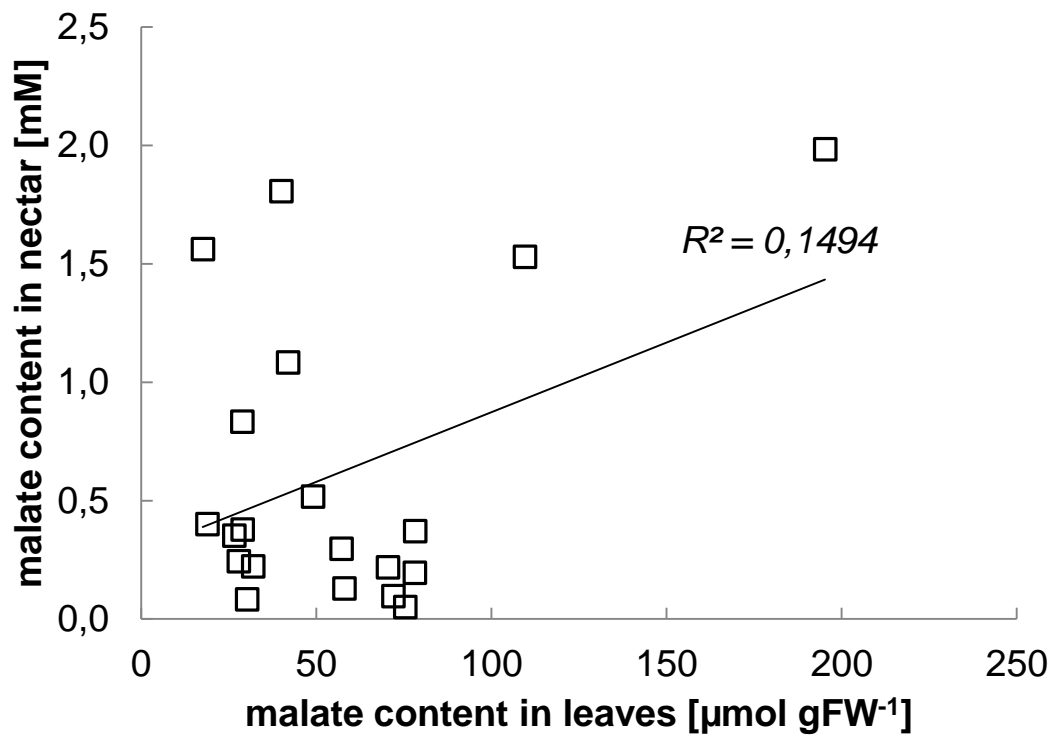

**S3 Fig.** Total concentration of malate in leaves [µmol gFW<sup>-1</sup>] and nectar [µmol L<sup>-1</sup>] of the same *Nicotiana* species. There is almost no correlation between the total concentrations in nectar and leaves ( $R^2 = 0.149$ ,  $p = 0.001$ ).
