# Supplementary material for: Nectar sugars and amino acids in day- and night-flowering Nicotiana species are more strongly shaped by pollinators’ preferences than organic acids and inorganic ions
Source: PubMed Central journal article supplement (PMC5415175; doi:10.1371/journal.pone.0176865), 2017-05-03
Supplement: pone.0176865.s004.pdf [file pone.0176865.s004.pdf]

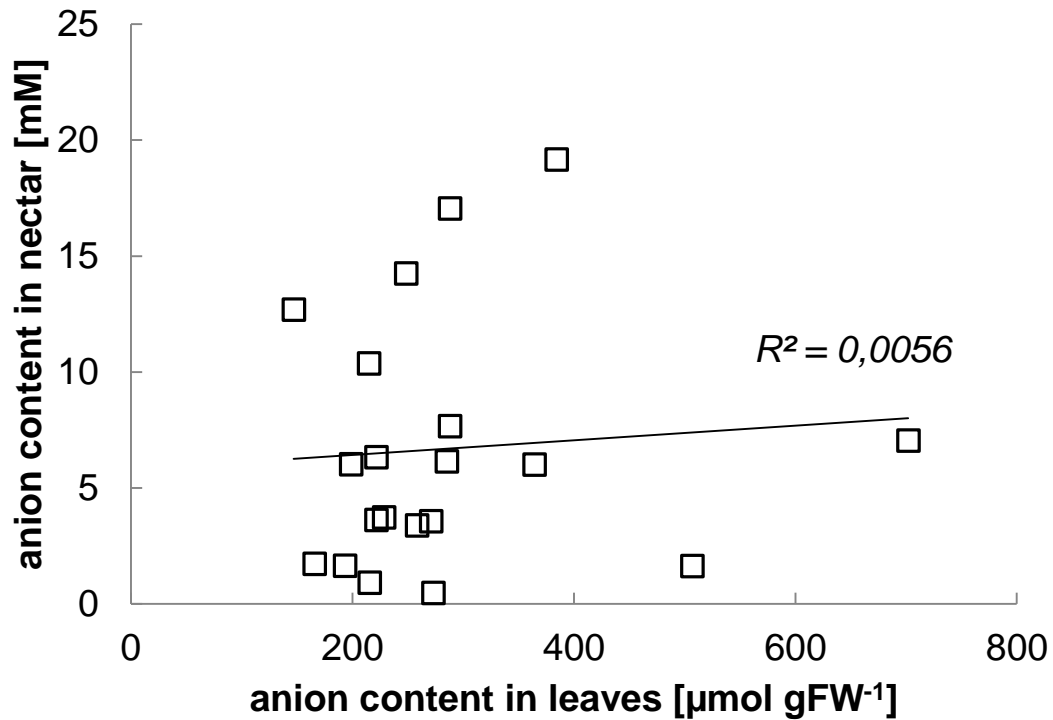

**S4 Fig.** Total concentration of anions in leaves [ $\mu\text{mol gFW}^{-1}$ ] and nectar [mM] of the same *Nicotiana* species. Neither does a noteworthy correlation exist between the total concentrations in nectar and leaves ( $R^2 = 0.006$ ,  $p < 0.001$ ) nor between the percentages of single anions in leaves and nectar, e.g. chloride ( $R^2 = 0.221$ ,  $p = 0.010$ ), nitrate ( $R^2 = 0.208$ ,  $p = 0.023$ ), phosphate ( $R^2 = -0.170$ ,  $p < 0.001$ ) and sulfate ( $R^2 = 0.040$ ,  $p = 0.003$ ).
