# Supplementary material for: Nectar sugars and amino acids in day- and night-flowering Nicotiana species are more strongly shaped by pollinators’ preferences than organic acids and inorganic ions
Source: PubMed Central journal article supplement (PMC5415175; doi:10.1371/journal.pone.0176865), 2017-05-03
Supplement: pone.0176865.s005.pdf [file pone.0176865.s005.pdf]

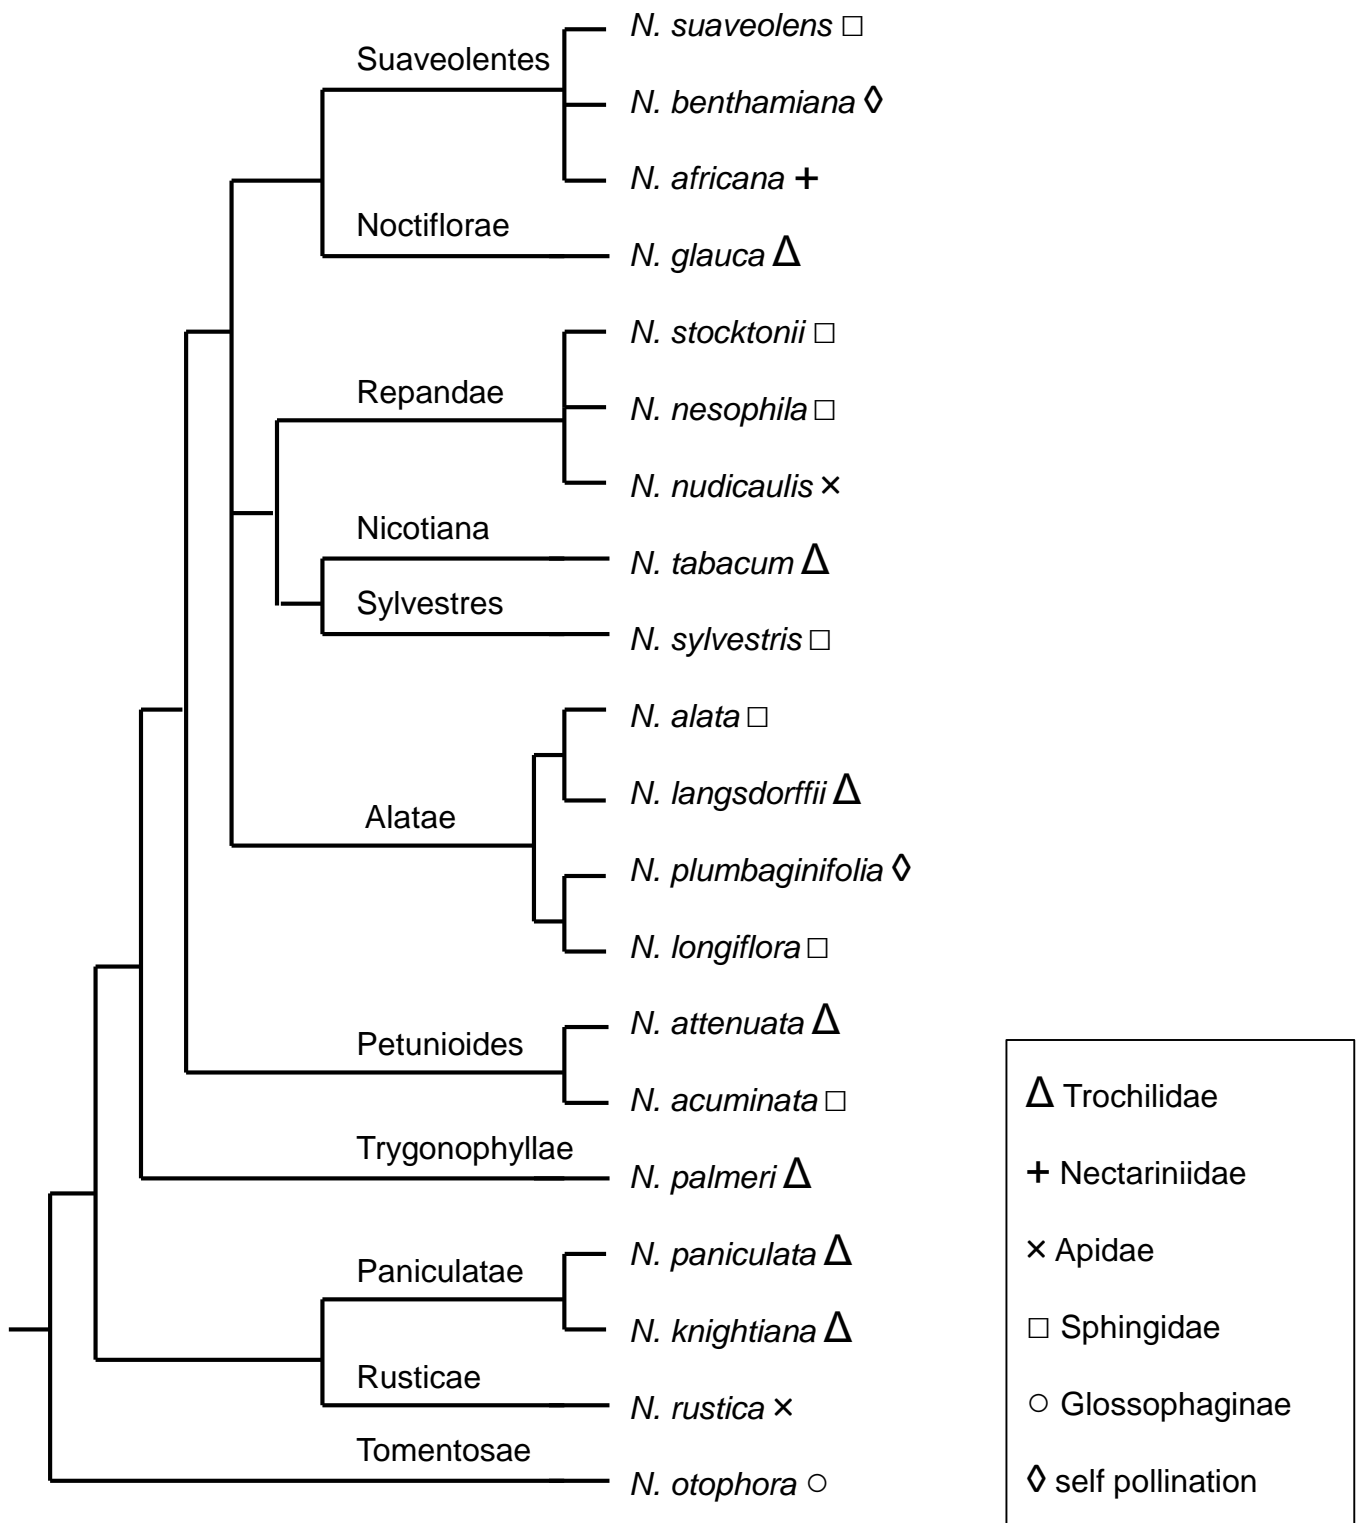

**S5 Fig. Simplified phylogenetic tree of all examined *Nicotiana* species and their main pollinators**

The symbols visualize the independence of pollinators from the sectional grouping (Goodspeed 1954, Knapp *et al.* 2004).
