# Supplementary material for: Nectar sugars and amino acids in day- and night-flowering Nicotiana species are more strongly shaped by pollinators’ preferences than organic acids and inorganic ions
Source: PLoS One. 2017 May 3;12(5):e0176865. doi: 10.1371/journal.pone.0176865 (PMC5415175; doi:10.1371/journal.pone.0176865)
Supplement: S2 Fig — (PDF) [file pone.0176865.s002.pdf]

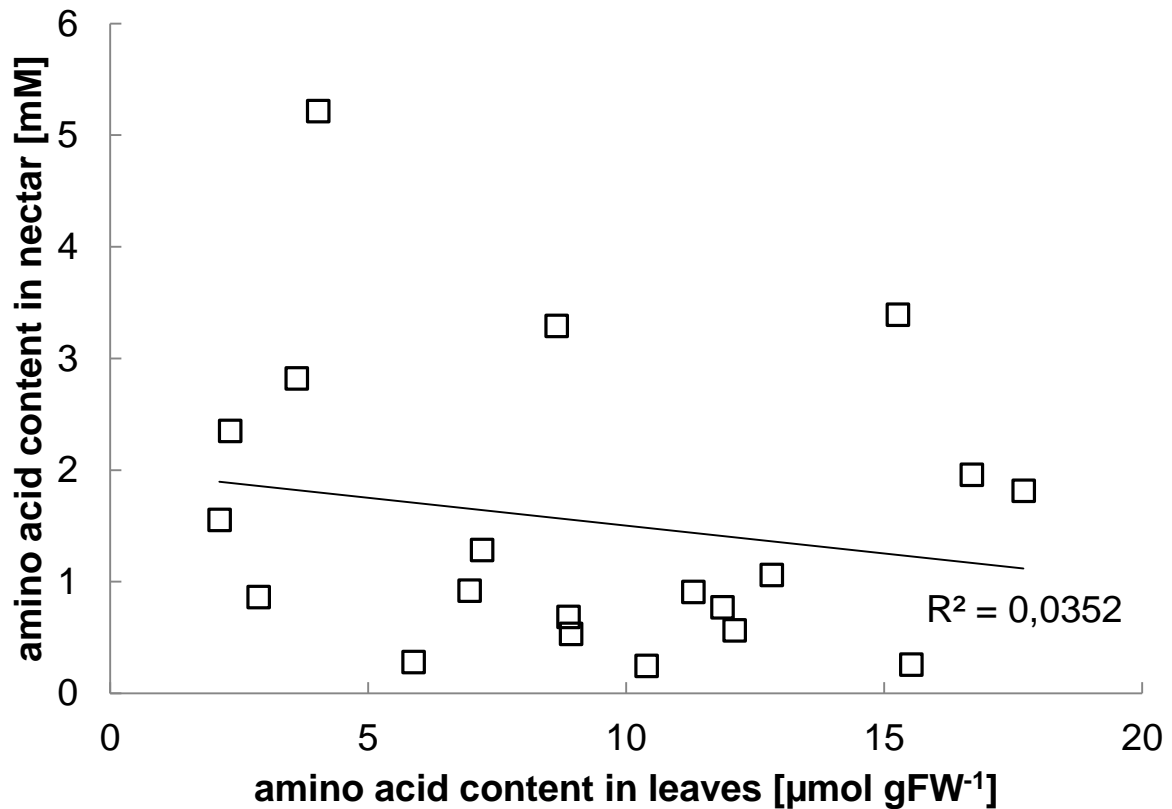

**S2 Fig. Total amino acid contents in leaves [μmol gFW<sup>-1</sup>] and nectar [mM] of the same *Nicotiana* species.** Neither does a noteworthy correlation exist between the total concentrations in nectar and leaves ( $R^2 = 0.035$ ,  $p < 0.001$ ) nor between the percentages of single amino acids in leaves and nectar, e.g. glutamate ( $R^2 = 0.011$ ,  $p < 0.001$ ), glutamine ( $R^2 = 0.053$ ,  $p < 0.001$ ), aspartate ( $R^2 = 0.015$ ,  $p < 0.001$ ) and asparagine ( $R^2 = 0.075$ ,  $p = 0.211$ ).
